# Supplementary material for: Extended-Synaptotagmin 1 Enhances Liver Cancer Progression Mediated by the Unconventional Secretion of Cytosolic Proteins
Source: Molecules. 2023 May 11;28(10):4033. doi: 10.3390/molecules28104033 (PMC10221710; doi:10.3390/molecules28104033)
Supplement: Supplementary file 1 [file molecules-28-04033-s001.zip › molecules-2395672-supplementary.pdf]

## **Supplementary Information**

### **Extended-synaptotagmin 1 enhances liver cancer progression mediated by cancer-related unconventional protein secretion**

#### **Authors**

Kohji Yamada<sup>1,†,\*</sup>, Yoshito Hannya<sup>1,3,†</sup>, Tsunekazu Oikawa<sup>2</sup>, Ayano Yoshida<sup>1</sup>, Kuniko Katagiri<sup>1</sup>, Saishu Yoshida<sup>1</sup>, Rei Koizumi<sup>1</sup>, Naoko Tago<sup>1</sup>, Yuya Shimoyama<sup>1,3</sup>, Akira Kawamura<sup>1</sup>, Yuta Mochimaru<sup>1</sup>, Ken Eto<sup>3</sup>, Kiyotsugu Yoshida<sup>1,\*</sup>

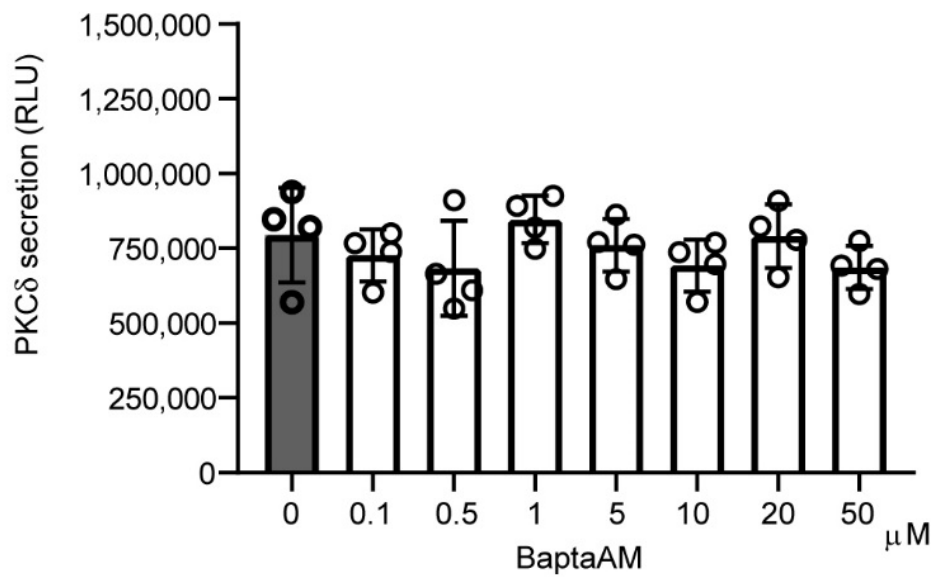

**Figure S1. No effect of BaptaAM on PKCδ secretion.**

PKCδ secretion measured by HiBiT extracellular assay in doxycycline-inducible HepG2 cells treated with or without BaptaAM at the indicated concentrations for 4 h;  $n = 4$  independent experiments. Cells were pre-cultured with a medium containing 0.5 μg / mL doxycycline for 24 h. Data are shown as mean  $\pm$  s.d.

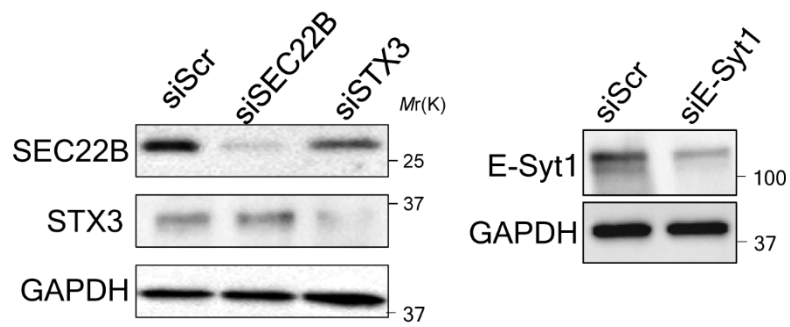

**Figure S2. Knockdown in HepG2 cells**

Immunoblot analysis of lysates from HepG2 cells treated with scrambled (Scr) or SEC22B, STX3 siRNAs, or E-Syt1 (2 nM) for 48 h. Representative images are shown more than three individual experiments. GAPDH was used as loading control.

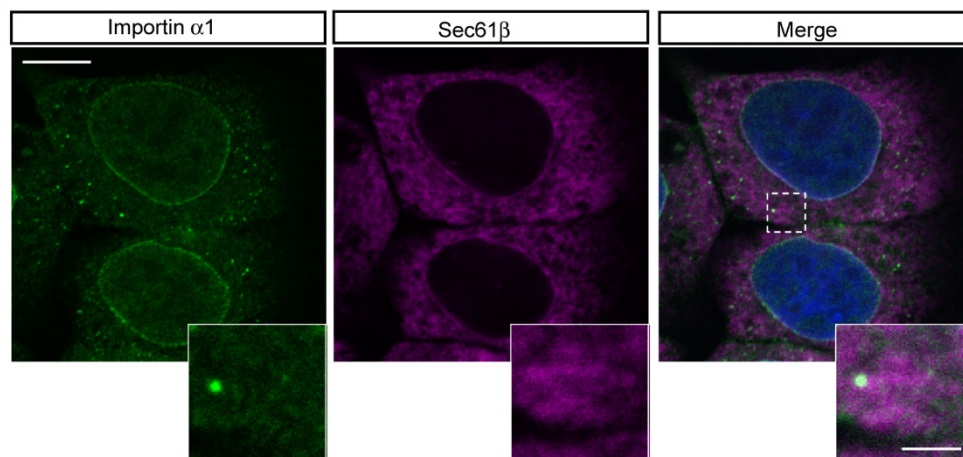

**Figure S3. ER localization of importin  $\alpha$ 1 in HepG2 cells.**

Confocal micrographs to detect co-localization of importin  $\alpha$ 1 on the ER in HepG2 cells. Sec61 $\beta$  and DAPI was used as an ER or nuclear markers, representatively.

Scale bar, 10  $\mu$ m; inset, 2  $\mu$ m.

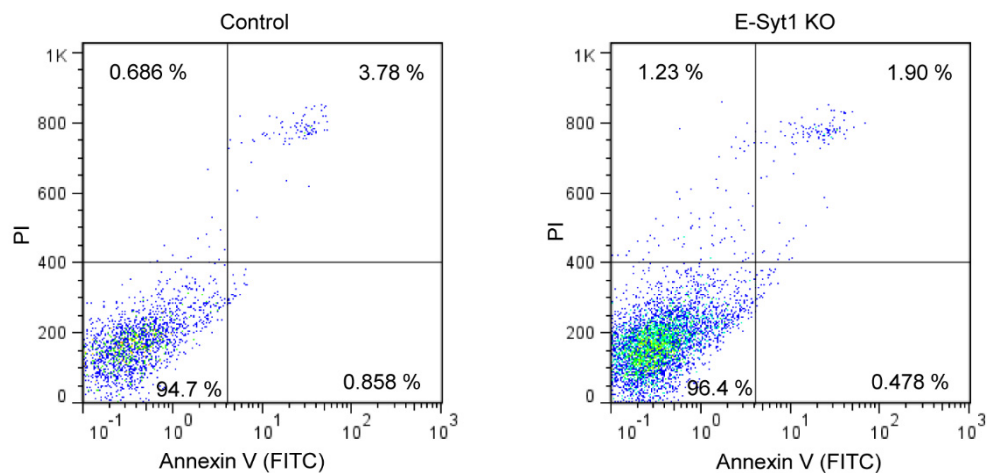

**Figure S4. Knockout of E-Syt1 shows no effect on cell apoptosis by serum starvation.**

Flow cytometric analysis of control or E-Syt1 KO HepG2 cells incubated under a 0.1% FBS-containing culture condition for 24 h to show independence of E-Syt1 expression in cell apoptosis. Annexin V-PI assay was performed using the Apoptosis Detection kit (Nacalai). Representative data are shown from three individual experiments.
